# Supplementary material for: Comprehensive analysis of PILRΑ’s association with the prognosis, tumor immune infiltration, and immunotherapy in pan-cancer
Source: Springer Nature journal article supplement (doi:10.1038/s41598-023-41649-6), 2023-08-31
Supplement: MOESM1 [file 41598_2023_41649_MOESM1_ESM.pdf]

**Comprehensive Analysis of PILRA's Association with  
the Prognosis, Tumor Immune Infiltration, and  
Immunotherapy in Pan-cancer**

**Qiao Li <sup>1</sup>, Zhirong Yang <sup>1</sup>, Xiaoyan He <sup>1</sup>, Xin Yang <sup>2\*</sup>**

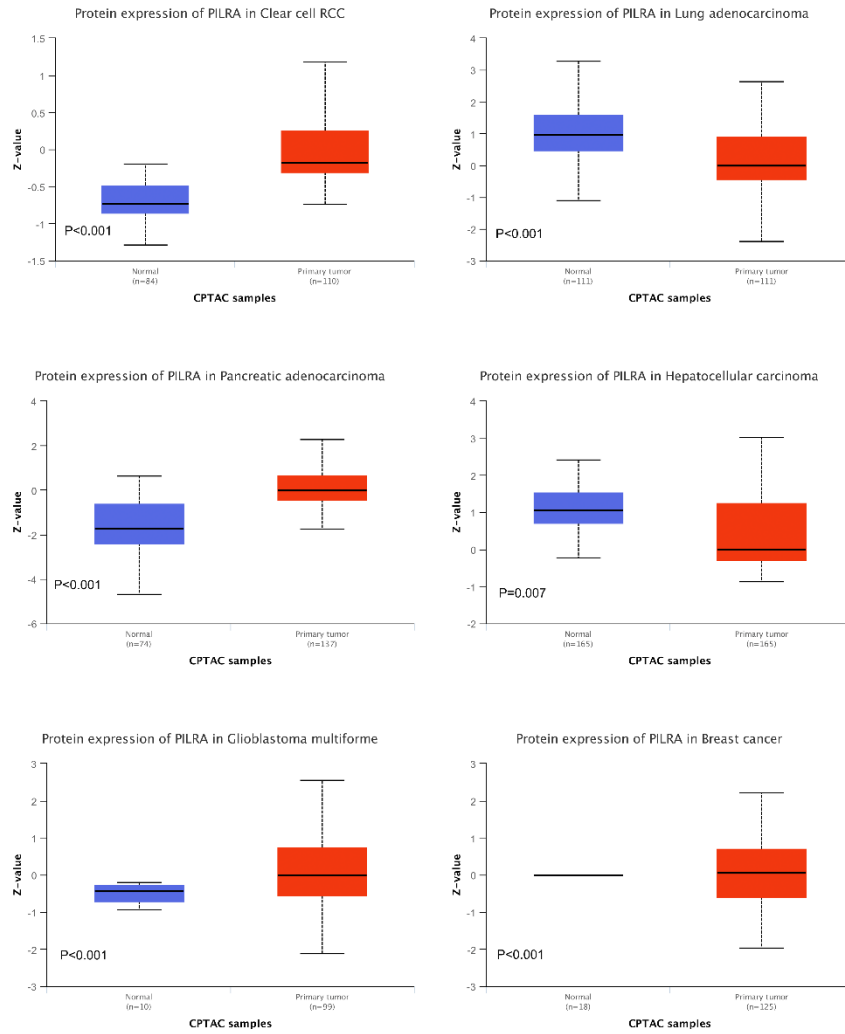

**Supplementary figure 1** | The expression differences of PILRA at protein levels were compared using CPTAC in pan-cancer, Related to Figure 1.

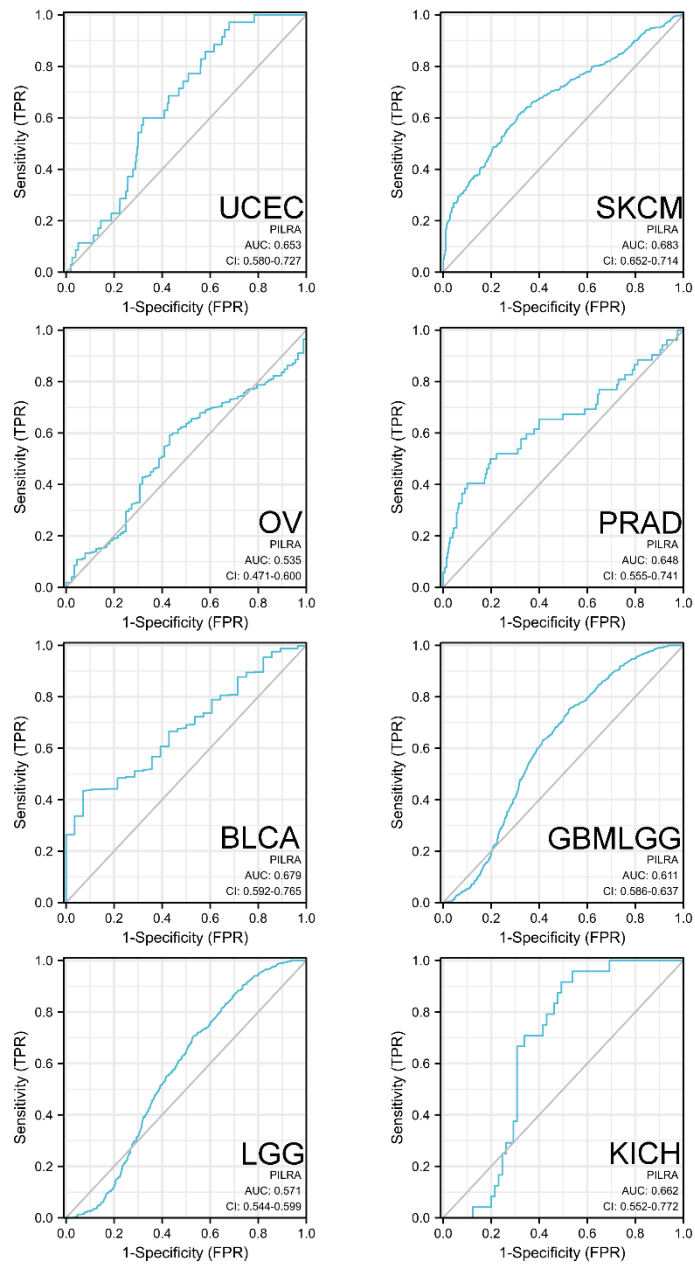

**Supplementary figure 2** | ROC curve analysis evaluating the diagnostic potency of PILRA in pan-cancer based on TCGA datasets, Related to Figure 3. 8 cancers with AUC < 0.7 for PILRA were displayed here.  $P < 0.05$  was considered significant.
